# Supplementary material for: Targeting BRAF Activation as Acquired Resistance Mechanism to EGFR Tyrosine Kinase Inhibitors in EGFR-Mutant Non-Small-Cell Lung Cancer
Source: MDPI journal article supplement (doi:10.3390/pharmaceutics13091478), 2021-09-15
Supplement: s1 [file s1]

# Supplementary Materials: Targeting BRAF Activation as Acquired Resistance Mechanism to EGFR Tyrosine Kinase Inhibitors in EGFR-Mutant Non-Small-Cell Lung Cancer

Frank Aboubakar Nana <sup>1,2</sup> and Sebahat Ocak

**Table S1.** Main clinical trials performed with third-generation EGFR tyrosine kinase inhibitors and BRAF +/- MEK inhibitors in advanced-stage NSCLC.

| Compound                         | Company                                   | Clinical trial |                                |                                                    |            |                                                                        |       |                    |         |                             |             |         |                            |             | Drugs No Longer in Active Clinical Development |                        |            |
|----------------------------------|-------------------------------------------|----------------|--------------------------------|----------------------------------------------------|------------|------------------------------------------------------------------------|-------|--------------------|---------|-----------------------------|-------------|---------|----------------------------|-------------|------------------------------------------------|------------------------|------------|
| caption                          | caption                                   | Phase          | Clinical Trials.gov identifier | Name                                               | Indication | N                                                                      | Drugs | ORR, % OR (95% CI) | P value | Median PFS, Months (95% CI) | HR (95% CI) | P value | Median OS, Months (95% CI) | HR (95% CI) | P value                                        | Recruitment Status     | References |
| Third-generation EGFR TKIs       |                                           |                |                                |                                                    |            |                                                                        |       |                    |         |                             |             |         |                            |             |                                                |                        |            |
| Abivertinib or avitinib (AC0010) | Hangzhou ACEA Pharmaceutical Research Co. | 1              | NCT02330367                    | EGFR+ NSCLC, after previous EGFR TKI               | 52         | Abivertinib 50, 100, 200, 350, 500, 550, 600 mg BID (RP2D: 300 mg BID) | 36.5  |                    |         |                             |             |         |                            |             |                                                | Unknown                | [1]        |
|                                  |                                           | 2              | NCT03300115                    | EGFR T790M+ NSCLC, after previous EGFR TKI         | 222        | Abivertinib 300 mg BID                                                 |       |                    |         |                             |             |         |                            |             |                                                | Unknown                |            |
|                                  |                                           | 3              | NCT03058094                    | EGFR T790M+ AEGIS-1 NSCLC, after previous EGFR TKI | 0          | Arm 1: Abivertinib 300 mg BID<br>Arm 2: Cisplatin-pemetrexed           |       |                    |         |                             |             |         |                            |             |                                                | Withdrawn              |            |
| Alflutinib (AST2818)             | Shanghai Allist Pharmaceuticals           | 1              | NCT02973763                    | EGFR+ NSCLC, after                                 | 14         | Alflutinib 20, 40, 80,                                                 | 50.0  |                    |         |                             |             |         |                            |             |                                                | Active, not recruiting | [2]        |

|                            |                                         |     |                 |                  |                                                                        |     |                                                                                                                                                                                                       |                                                                                  |                                                                       |                           |       |                                                                                     |     |                                                              |
|----------------------------|-----------------------------------------|-----|-----------------|------------------|------------------------------------------------------------------------|-----|-------------------------------------------------------------------------------------------------------------------------------------------------------------------------------------------------------|----------------------------------------------------------------------------------|-----------------------------------------------------------------------|---------------------------|-------|-------------------------------------------------------------------------------------|-----|--------------------------------------------------------------|
| Almonertinib<br>(HS-10296) | Jiangsu Hansoh<br>Pharmaceutical<br>Co. | 1/2 | NCT03127<br>449 |                  | previous<br>EGFR TKI<br>EGFR+<br>NSCLC, after<br>previous<br>EGFR TKI  | 116 | 160, 240<br>mg QD<br>Alflutinib<br>80, 160 mg<br>QD (RP2D:<br>80 mg QD)                                                                                                                               | 76.7<br>(68.0–<br>84.1)                                                          | 11.1 (9.6-NR)                                                         | Active, not<br>recruiting | [2]   |                                                                                     |     |                                                              |
|                            |                                         | 2   | NCT03452<br>592 | ALSC003          | T790M+<br>NSCLC, after<br>previous<br>EGFR TKI                         | 220 | Alflutinib<br>80 mg QD                                                                                                                                                                                | 74.1<br>(67.8–<br>79.7)                                                          |                                                                       |                           |       |                                                                                     |     |                                                              |
|                            |                                         | 1   | NCT02981<br>108 |                  | EGFR+<br>(including<br>T790M+)<br>NSCLC, after<br>previous<br>EGFR TKI | 120 | Almonerti<br>nib 55, 110,<br>220, 260<br>mg QD<br>(RP2D: 110<br>mg QD)                                                                                                                                | 50 (41–<br>59)<br>overall,<br>52 (42–<br>63) in 94<br>patients<br>with<br>T790M+ | 9.6 (8.3–11.1),<br>11.0 (9.5-<br>NR) in 94<br>patients with<br>T790M+ | Unknown                   | [4]   |                                                                                     |     |                                                              |
|                            |                                         | 2   | NCT02981<br>108 | APOLL<br>O       | EGFR+<br>(including<br>T790M+)<br>NSCLC, after<br>previous<br>EGFR TKI | 244 | Almonerti<br>nib 110 mg<br>QD                                                                                                                                                                         | 68.9<br>(62.2–<br>74.2)                                                          |                                                                       |                           |       |                                                                                     |     |                                                              |
| Lazertinib<br>(YH25448)    | Yuhan<br>Coporation                     | 1/2 | NCT03046<br>992 |                  | EGFR+<br>NSCLC, after<br>previous<br>EGFR TKI                          | 127 | Lazertinib<br>20, 40, 80,<br>120, 160,<br>240, 320<br>QD (RP2D:<br>240 mg<br>QD)                                                                                                                      | 54 (46–<br>63)                                                                   |                                                                       | Active, not<br>recruiting | [5]   |                                                                                     |     |                                                              |
| Naquotinib<br>(ASP8273)    | Astellas<br>Pharma                      | 3   | NCT02588<br>261 | SOLAR            | EGFR+<br>NSCLC, 1L<br>treatment                                        | 530 | Arm 1:<br>Naquotini<br>b 300 mg<br>QD<br>Arm 2:<br>Gefitinib<br>250 mg<br>daily or<br>erlotinib<br>150 mg QD<br>Nazartinib<br>75, 100,<br>150, 200,<br>225, 300,<br>350 mg QD<br>(RP2D: 150<br>mg QD) | 33 (27.4–<br>39.0)<br>47.9<br>(41.7–<br>54.1)                                    | 9.3 (5.6–11.1)                                                        | 1,611                     | 0.992 | Terminate<br>d                                                                      | [6] | Stopped in 2017 due to<br>lower efficacy than<br>osimertinib |
| Nazartinib (EGF-<br>816)   | Novartis<br>Oncology                    | 1/2 | NCT02108<br>964 | CEGF81<br>6X2101 | EGFR+<br>NSCLC, ≥ 1L<br>treatment                                      | 180 |                                                                                                                                                                                                       | 51 (43–<br>59)                                                                   | 9.1 (7.3–11.1)                                                        | Active, not<br>recruiting | [7]   | Stopped in 2018 due to<br>lower efficacy and<br>higher toxicity than<br>osimertinib |     |                                                              |

|                                      |                         |     |                 |        |                                                        |                                       |                                                                                                                                       |                                                                                                                                         |                         |                                                                                               |      |                      |                           |                      |                                                                                                   |       |                           |         |
|--------------------------------------|-------------------------|-----|-----------------|--------|--------------------------------------------------------|---------------------------------------|---------------------------------------------------------------------------------------------------------------------------------------|-----------------------------------------------------------------------------------------------------------------------------------------|-------------------------|-----------------------------------------------------------------------------------------------|------|----------------------|---------------------------|----------------------|---------------------------------------------------------------------------------------------------|-------|---------------------------|---------|
| Olmutinib<br>(HM61713/BI<br>1482694) | Hanmi<br>Pharmaceutical | 1/2 | NCT01588<br>145 |        | EGFR<br>T790M+<br>NSCLC, after<br>previous<br>EGFR TKI | 272                                   | Olmutinib<br>300 mg<br>QD, 500<br>mg BID,<br>800 mg QD<br>(RP2D: 800<br>mg QD)                                                        | 55.1<br>(42.6–<br>67.1)                                                                                                                 |                         | 6.9 (5.6-9.7)                                                                                 |      | NR                   | Completed                 | [8]                  | Stopped in 2016<br>because of two cases<br>of toxic epidermal<br>necrolysis, one of<br>them fatal |       |                           |         |
| Osimertinib<br>(AZD9291)             | Astra Zeneca            | 1   | NCT01802<br>632 | AURA   | EGFR<br>T790M+<br>NSCLC, after<br>previous<br>EGFR TKI | 253                                   | Osimertini<br>b 20 mg<br>QD and<br>then<br>escalation<br>to 240 mg<br>QD<br>according<br>to<br>tolerance<br>could be<br>evaluate<br>d | 61 (52–<br>70) in<br>patients<br>with<br>T790M+,<br>21 (12–<br>34) in<br>patients<br>with<br>T790M-<br>who<br>could be<br>evaluate<br>d |                         | 9.6 (8.3-NR)<br>in patients<br>with<br>T790M+, 2.8<br>(2.1–4.3) in<br>patients with<br>T790M- |      |                      | Active, not<br>recruiting | [9]                  |                                                                                                   |       |                           |         |
|                                      |                         | 2   | NCT01802<br>632 | AURA   | EGFR<br>T790M+<br>NSCLC, after<br>previous<br>EGFR TKI | 201                                   | Osimertini<br>b 20, 40, 80,<br>160, 240<br>mg QD<br>(RP2D: 80<br>mg QD)                                                               | 62 (54–<br>68)                                                                                                                          |                         | 12.3 (9.5–<br>13.8)                                                                           |      |                      | Active, not<br>recruiting | [10]                 |                                                                                                   |       |                           |         |
|                                      |                         | 1/2 | NCT01802<br>632 | AURA   | EGFR+<br>NSCLC, 1L<br>treatment                        | 60                                    | Osimertini<br>b 80 or 160<br>mg QD                                                                                                    | 77 (64–<br>87)                                                                                                                          |                         | 20.5 (15.0–<br>26.1)                                                                          |      |                      | Active, not<br>recruiting | [11]                 |                                                                                                   |       |                           |         |
|                                      |                         | 2   | NCT02094<br>261 | AURA2  | EGFR<br>T790M+<br>NSCLC, after<br>previous<br>EGFR TKI | 210                                   | Osimertini<br>b 80 mg<br>QD                                                                                                           | 70 (64–<br>77)                                                                                                                          |                         | 9.9 (8.5–12.3)                                                                                |      |                      | Active, not<br>recruiting | [12]                 |                                                                                                   |       |                           |         |
|                                      |                         | 3   | NCT02151<br>981 | AURA3  | EGFR<br>T790M+<br>NSCLC, after<br>previous<br>EGFR TKI | 279                                   | Arm 1:<br>Osimertini<br>b 80 mg<br>QD                                                                                                 | 71 (65–<br>76)                                                                                                                          | 5.39<br>(3.47–<br>8.48) | < 0.001                                                                                       | 10.1 | 0.30 (0.23–<br>0.41) | < 0.001                   | 26.8 (23.5–<br>31.5) | 0.87 (0.67–<br>1.12)                                                                              | 0.277 | Active, not<br>recruiting | [13,14] |
|                                      |                         |     |                 |        |                                                        | Arm 2:<br>Platinum-<br>pemetrexe<br>d | 31 (24–<br>40)                                                                                                                        |                                                                                                                                         | 4.4                     |                                                                                               |      | 22.5 (20.2–<br>28.8) |                           |                      |                                                                                                   |       |                           |         |
|                                      |                         | 3   | NCT02296<br>125 | FLAURA | EGFR+<br>NSCLC, 1L<br>treatment                        | 556                                   | Arm 1:<br>Osimertini<br>b 80 mg<br>QD                                                                                                 | 80 (75–<br>85)                                                                                                                          | 1.27<br>(0.85–<br>1.90) | 0.24                                                                                          | 18.9 | 0.46 (0.37–<br>0.57) | < 0.001                   | 38.6 (34.5–<br>41.8) | 0.80 (0.64–<br>1.00)                                                                              | 0.046 | Active, not<br>recruiting | [15,16] |

|                                                    |                      |     |             |                                                        |     |                                                                          |                                                                             |                 |                |                        |      |                                                                            |
|----------------------------------------------------|----------------------|-----|-------------|--------------------------------------------------------|-----|--------------------------------------------------------------------------|-----------------------------------------------------------------------------|-----------------|----------------|------------------------|------|----------------------------------------------------------------------------|
|                                                    |                      |     |             |                                                        |     | Arm 2:<br>Gefitinib<br>250 mg QD<br>or erlotinib<br>150 mg QD            | 76 (70–<br>81)                                                              | 10.2            | 31.8 (26.6–36) |                        |      |                                                                            |
| Rezivertinib (BPI-7711)                            | Beta Pharma Inc.     | 1   | NCT03386955 | EGFR T790M+ NSCLC, after previous EGFR TKI             | 82  | Rezivertini b 30, 60, 120, 180, 240, 300 mg QD (RP2D: 180 mg QD)         | 54.5 (30–55)                                                                |                 |                | Active, not recruiting | [17] |                                                                            |
|                                                    |                      | 2   | NCT03812809 | EGFR T790M+ NSCLC, after previous EGFR TKI             | 226 | Rezivertini b 180 mg QD                                                  |                                                                             |                 |                | Active, not recruiting |      |                                                                            |
|                                                    |                      |     |             |                                                        |     |                                                                          | 59 (45–73) in 46 patients with                                              |                 |                |                        |      |                                                                            |
| Rociletinib (CO-1686)                              | Clovis Oncology      | 1/2 | NCT01526928 | EGFR T790M+ NSCLC, after previous EGFR TKI             | 130 | Rociletinib T790M+, 150 mg QD 29 (8–51) to 900 mg BID (RP2D: 625 mg BID) | in 17 patients with T790M-who could be evaluated 28 in patients with T790M- |                 |                | Terminated             | [18] | Stopped in 2016 due to lower efficacy and higher toxicity than osimertinib |
| TAS-121                                            | Taiho Pharmaceutical | 1   | NCT02274337 | EGFR+ NSCLC, after previous EGFR TKI                   | 134 | TAS-121 4, 8, 10, 12, 16 mg QD                                           | T790M+, 19 in patients with T790M-                                          |                 |                |                        | [19] | Stopped in 2018 due to lower efficacy than osimertinib                     |
|                                                    |                      |     |             |                                                        |     | BRAF +/- MEK kinase inhibitors                                           |                                                                             |                 |                |                        |      |                                                                            |
| Dabrafenib (GSK-2118436) + trametinib (GSK1120212) | GlaxoSmithKline      | 2   | NCT01336634 | BRAF V600E+ NSCLC, after previous 1 to 3L chemotherapy | 57  | Dabrafenib 150 mg BID + trametinib 2 mg QD                               | 63.2 (43.3–75.6)                                                            | 9.7 (6.9–19.6)  | Immature       | Active, not recruiting | [20] |                                                                            |
|                                                    |                      | 2   | NCT01336634 | BRAF V600E+                                            | 36  | Dabrafenib 150 mg                                                        | 64 (46–79)                                                                  | 10.9 (7.0–16.6) | 24.6 (12.3-NE) | Completed              | [21] |                                                                            |

|                                        |                        |   |                 |                        |    |                               |                                                                                                                                                                  |              |                     |           |      |
|----------------------------------------|------------------------|---|-----------------|------------------------|----|-------------------------------|------------------------------------------------------------------------------------------------------------------------------------------------------------------|--------------|---------------------|-----------|------|
| Vemurafenib<br>(RO5185426,<br>PLX4032) | Roche and<br>Plexxicon | 2 | NCT01524<br>978 | NSCLC, 1L<br>treatment | 62 | BID+<br>trametinib<br>2 mg QD | 37.1<br>(25.2–<br>50.3)<br>overall,<br>37.5<br>(8.5–<br>75.5) in<br>previous<br>patients,<br>37.0<br>(24.3–<br>51.3) in<br>previous<br>ly<br>treated<br>patients | 6.5 (5.29.0) | 15.4 (9.6–<br>22.8) | Completed | [22] |
|----------------------------------------|------------------------|---|-----------------|------------------------|----|-------------------------------|------------------------------------------------------------------------------------------------------------------------------------------------------------------|--------------|---------------------|-----------|------|

**Table S2.** Main clinical trials ongoing or planned with third- or fourth-generation EGFR tyrosine kinase inhibitors and BRAF + MEK inhibitors in advanced-stage NSCLC.

| Compound                          | Company                                   | Clinical trial |                                |          |                                                                                     |             |                                                                                                                                             |                        |
|-----------------------------------|-------------------------------------------|----------------|--------------------------------|----------|-------------------------------------------------------------------------------------|-------------|---------------------------------------------------------------------------------------------------------------------------------------------|------------------------|
| caption                           | caption                                   | Phase          | Clinical Trials.gov identifier | Name     | Indication                                                                          | N estimated | Drugs                                                                                                                                       | Recruitment status     |
| <b>Third-generation EGFR TKIs</b> |                                           |                |                                |          |                                                                                     |             |                                                                                                                                             |                        |
| Abivertinib (AC0010)              | Hangzhou ACEA Pharmaceutical Research Co. | 3              | NCT03856697                    | AEGIS-2  | EGFR+ NSCLC, 1L treatment                                                           | 406         | Arm 1: Abivertinib 300 mg BID<br>Arm 2: Gefitinib 250 mg QD                                                                                 | Not yet recruiting     |
| Alflutininb (AST2818)             | Shanghai Allist Pharmaceuticals           | 3              | NCT03787992                    | FLAG     | EGFR+ NSCLC, 1L treatment                                                           | 358         | Arm 1: Alflutininb 80 mg QD<br>Arm 2: Gefitinib 250 mg QD                                                                                   | Active, not recruiting |
| Almonertinib (HS-10296)           | Jiangsu Hansoh Pharmaceutical Co.         | 3              | NCT03849768                    |          | EGFR+ NSCLC, 1L treatment                                                           | 350         | Arm 1: Almonertinib 110 mg QD<br>Arm 2: Gefitinib 250 mg QD                                                                                 | Recruiting             |
|                                   |                                           | 3              | NCT04500704                    | ACROSS 1 | EGFR+ NSCLC with other co-occurring driver mutations, 1L treatment                  | 166         | Arm 1: Almonertinib 110 mg QD<br>Arm 2: Almonertinib 110 mg QD + 4 to 6 cycles of carboplatin-pemetrexed followed by pemetrexed maintenance | Not yet recruiting     |
|                                   |                                           | 3              | NCT04500717                    | ACROSS 2 | EGFR+ NSCLC with co-occurring tumor suppressor genes (P53, RB1, PTEN), 1L treatment | 460         | Arm 1: Almonertinib 110 mg QD<br>Arm 2: Almonertinib 110 mg QD + 4 to 6 cycles of carboplatin-pemetrexed followed by pemetrexed maintenance | Not yet recruiting     |
| ASK120067                         | Jiangsu Aosaikang Pharmaceutical Co.      | 1/2            | NCT03502850                    |          | EGFR T790M+ NSCLC, after previous EGFR TKI                                          | 507         | ASK120067 40,80,160,240,320,480 mg QD                                                                                                       | Recruiting             |
|                                   |                                           | 3              | NCT04143607                    |          | EGFR+ NSCLC, 1L treatment                                                           | 334         | Arm 1: ASK120067 160 mg BID<br>Arm 2: Gefitinib 250 mg QD                                                                                   | Recruiting             |

|                         |                                    |     |             |          |                                            |      |                                                                                                                                                                                                                                                                                                                |                        |
|-------------------------|------------------------------------|-----|-------------|----------|--------------------------------------------|------|----------------------------------------------------------------------------------------------------------------------------------------------------------------------------------------------------------------------------------------------------------------------------------------------------------------|------------------------|
| D-0316                  | Beta Pharmaceuticals Co.           | 1   | NCT03452150 |          | EGFR+ NSCLC, after previous EGFR TKI       | 50   | D-0316 QD, escalation according to tolerance                                                                                                                                                                                                                                                                   | Active, not recruiting |
|                         |                                    | 2   | NCT03861156 |          | EGFR T790M+ NSCLC, after previous EGFR TKI | 286  | D-0316 75 mg QD, escalation to 100 mg QD according to tolerance                                                                                                                                                                                                                                                | Active, not recruiting |
|                         |                                    | 2/3 | NCT04206072 |          | EGFR+ NSCLC, 1L treatment                  | 360  | Arm 1: D-0316 75 mg QD for first cycle and then escalation to 100 mg QD according to tolerance<br>Arm 2: Icotinib 125 mg TID                                                                                                                                                                                   | Active, not recruiting |
| Lazertinib (YH25448)    | Yuhan Coporation                   | 3   | NCT04248829 | LASER301 | EGFR+ NSCLC, 1L treatment                  | 380  | Arm 1: Lazertinib 240 mg QD<br>Arm 2: Gefitinib 250 mg QD                                                                                                                                                                                                                                                      | Recruiting             |
|                         |                                    | 3   | NCT04487080 | MARIPOSA | EGFR+ NSCLC, 1L treatment                  | 1000 | Arm 1: Lazertinib 240 mg QD + amivantamab (IV) (1050 mg if < 80 kg and 1400 mg if ≥ 80 kg in 28-day cycles: once weekly in cycle 1 (split dose on days 1-2) and then every 2 weeks)<br>Arm 2: Lazertinib 240 mg QD + matching osimertinib placebo<br>Arm 3: Osimertinib 80 mg QD + matching lazertinib placebo | Recruiting             |
| Osimertinib (AZD9291)   | Astra Zeneca                       | 3   | NCT04035486 | FLAURA2  | EGFR+ NSCLC, 1L treatment                  | 586  | Arm 1: Osimertinib 80 mg QD<br>Arm 2: Osimertinib 80 mg QD + 4 cycles of platinum-pemetrexed followed by pemetrexed maintenance                                                                                                                                                                                | Recruiting             |
| Rezivertinib (BPI-7711) | Beta Pharma Inc.                   | 3   | NCT03866499 | RAZOR    | EGFR+ NSCLC, 1L treatment                  | 294  | Arm 1: Rezivertinib 180 mg QD<br>Arm 2: Gefitinib 250 mg QD                                                                                                                                                                                                                                                    | Recruiting             |
| SH-1028                 | Nanjing Sanhome Pharmaceutical Co. | 1   | NCT03603262 |          | EGFR+ NSCLC, after previous EGFR TKI       | 85   | SH-1028 starting dose 60 mg QD. If tolerated subsequent cohorts will test increasing doses: 100,200,300,400 mg QD                                                                                                                                                                                              | Unknown                |
|                         |                                    | 2   | NCT03823807 |          | EGFR T790M+ NSCLC, after previous EGFR TKI | 300  | SH-1028 100 mg QD                                                                                                                                                                                                                                                                                              | Unknown                |
|                         |                                    | 3   | NCT04239833 |          | EGFR+ NSCLC, 1L treatment                  | 245  | Arm 1: SH-1028 200 mg QD<br>Arm 2: Gefitinib 250 mg QD                                                                                                                                                                                                                                                         | Not yet recruiting     |

|                                                    |                           |     |             |           |                                                        |     |                                               |            |
|----------------------------------------------------|---------------------------|-----|-------------|-----------|--------------------------------------------------------|-----|-----------------------------------------------|------------|
| <b>Fourth-generation EGFR TKIs</b>                 |                           |     |             |           |                                                        |     |                                               |            |
| BLU-945                                            | Blueprint Medicines       | 1/2 | NCT04862780 | SYMPHONY  | EGFR T790M and C797S+ NSCLC, after previous EGFR TKI   | 120 | BLU-945, escalation according to tolerance    | Recruiting |
| <b>BRAF + MEK kinase inhibitors</b>                |                           |     |             |           |                                                        |     |                                               |            |
| Dabrafenib (GSK-2118436) + trametinib (GSK1120212) | GlaxoSmithKline           | 2   | NCT03543306 | BRF113928 | BRAF V600E+ NSCLC, after previous 1 to 2L chemotherapy | 27  | Dabrafenib 150 mg BID + trametinib 2 mg QD    | Recruiting |
| Encorafenib (LGX818) + binimetinib (ARRY-162)      | Novartis, Array Biopharma | 2   | NCT03915951 |           | BRAF V600E+ NSCLC, ≥ 1L treatment                      | 90  | Encorafenib 450 mg QD + binimetinib 45 mg BID | Recruiting |

## References

- Ma, Y.; Zheng, X.; Zhao, H.; Fang, W.; Zhang, Y.; Ge, J.; Wang, L.; Wang, W.; Jiang, J.; Chuai, J. et al. First-in-Human Phase I Study of AC0010, a Mutant-Selective EGFR Inhibitor in Non-Small Cell Lung Cancer: Safety, Efficacy, and Potential Mechanism of Resistance. *J. Thorac. Oncol.* **2018**, *13*, 968–977.
- Shi, Y.; Zhang, S.; Hu, X.; Feng, J.; Ma, Z.; Zhou, J.; Yang, N.; Wu, L.; Liao, W.; Zhong, D.; et al. Safety, Clinical Activity, and Pharmacokinetics of Alflutinib (AST2818) in Patients With Advanced NSCLC With EGFR T790M Mutation. *J. Thorac. Oncol.* **2020**, *15*, 1015–1026.
- Shi, Y.; Hu, X.; Zhang, S.; Lv, D.; Wu, L.; Yu, Q.; Zhang, Y.; Liu, L.; Wang, X.; Cheng, Y.; et al. Efficacy, safety, and genetic analysis of furmonertinib (AST2818) in patients with EGFR T790M mutated non-small-cell lung cancer: a phase 2b, multicentre, single-arm, open-label study. *Lancet. Respir. Med.* **2021**, *9*, 829–839.
- Yang, J.C.; Camidge, D.R.; Yang, C.T.; Zhou, J.; Guo, R.; Chiu, C.H.; Chang, G.C.; Shiah, H.S.; Chen, Y.; Wang, C.C.; et al. Safety, Efficacy, and Pharmacokinetics of Almonertinib (HS-10296) in Pretreated Patients With EGFR-Mutated Advanced NSCLC: A Multicenter, Open-label, Phase 1 Trial. *J. Thorac. Oncol.* **2020**, *15*, 1907–1918.
- Ahn, M.J.; Han, J.Y.; Lee, K.H.; Kim, S.W.; Kim, D.W.; Lee, Y.G.; Cho, E.K.; Kim, J.H.; Lee, G.W.; Lee, J.S.; et al. Lazertinib in patients with EGFR mutation-positive advanced non-small-cell lung cancer: results from the dose escalation and dose expansion parts of a first-in-human, open-label, multicentre, phase 1-2 study. *Lancet. Oncol.* **2019**, *20*, 1681–1690.
- Kelly, R.J.; Shepherd, F.A.; Krivoshik, A.; Jie, F.; Horn, L. A phase III, randomized, open-label study of ASP8273 versus erlotinib or gefitinib in patients with advanced stage IIIB/IV non-small-cell lung cancer. *Ann. Oncol.* **2019**, *30*, 1127–1133.
- Tan, D.S.; Leighl, N.B.; Riely, G.J.; Yang, J.C.; Sequist, L.V.; Wolf, J.; Seto, T.; Felip, E.; Aix, S.P.; Jonnaert, M.; et al. Safety and efficacy of nazartinib (EGF816) in adults with EGFR-mutant non-small-cell lung carcinoma: a multicentre, open-label, phase 1 study. *Lancet. Respir. Med.* **2020**, *8*, 561–572.
- Kim, D.W.; Lee, D.H.; Han, J.Y.; Lee, J.; Cho, B.C.; Kang, J.H.; Lee, K.H.; Cho, E.K.; Kim, J.S.; Min, Y.J.; et al. Safety, tolerability, and anti-tumor activity of olmutinib in non-small cell lung cancer with T790M mutation: A single arm, open label, phase 1/2 trial. *Lung Cancer* **2019**, *135*, 66–72.
- Jänne, P.A.; Yang, J.C.; Kim, D.W.; Planchard, D.; Ohe, Y.; Ramalingam, S.S.; Ahn, M.J.; Kim, S.W.; Su, W.C.; Horn, L.; et al. AZD9291 in EGFR inhibitor-resistant non-small-cell lung cancer. *N. Engl. J. Med.* **2015**, *372*, 1689–99.
- Yang, J.C.; Ahn, M.J.; Kim, D.W.; Ramalingam, S.S.; Sequist, L.V.; Su, W.C.; Kim, S.W.; Kim, J.H.; Planchard, D.; Felip, E.; et al. Osimertinib in Pretreated T790M-Positive Advanced Non-Small-Cell Lung Cancer: AURA Study Phase II Extension Component. *J. Clin. Oncol.* **2017**, *35*, 1288–1296.
- Ramalingam, S.S.; Yang, J.C.; Lee, C.K.; Kurata, T.; Kim, D.W.; John, T.; Nogami, N.; Ohe, Y.; Mann, H.; Rukazenzov, Y.; et al. Osimertinib As First-Line Treatment of EGFR Mutation-Positive Advanced Non-Small-Cell Lung Cancer. *J. Clin. Oncol.* **2018**, *36*, 841–849.
- Goss, G.; Tsai, C.M.; Shepherd, F.A.; Bazhenova, L.; Lee, J.S.; Chang, G.C.; Crino, L.; Satouchi, M.; Chu, Q.; Hida, T.; et al. Osimertinib for pretreated EGFR Thr790Met-positive advanced non-small-cell lung cancer (AURA2): a multicentre, open-label, single-arm, phase 2 study. *Lancet. Oncol.* **2016**, *17*, 1643–1652.



13. Mok, T.S.; Wu, Y.L.; Ahn, M.J.; Garassino, M.C.; Kim, H.R.; Ramalingam, S.S.; Shepherd, F.A.; He, Y.; Akamatsu, H.; Theelen, W.S.; et al. Osimertinib or Platinum-Pemetrexed in EGFR T790M-Positive Lung Cancer. *N. Engl. J. Med.* **2017**, *376*, 629–640.
14. Papadimitrakopoulou, V.A.; Mok, T.S.; Han, J.Y.; Ahn, M.J.; Delmonte, A.; Ramalingam, S.S.; Kim, S.W.; Shepherd, F.A.; Laskin, J.; He, Y.; Akamatsu, H.; et al. Osimertinib versus platinum-pemetrexed for patients with EGFR T790M advanced NSCLC and progression on a prior EGFR-tyrosine kinase inhibitor: AURA3 overall survival analysis. *Ann. Oncol.* **2020**, *31*, 1536–1544.
15. Ramalingam, S.S.; Vansteenkiste, J.; Planchard, D.; Cho, B.C.; Gray, J.E.; Ohe, Y.; Zhou, C.; Reungwetwattana, T.; Cheng, Y.; Chewaskulyong, B.; et al. Overall Survival with Osimertinib in Untreated, EGFR-Mutated Advanced NSCLC. *N. Engl. J. Med.* **2020**, *382*, 41–50.
16. Soria, J.C.; Ohe, Y.; Vansteenkiste, J.; Reungwetwattana, T.; Chewaskulyong, B.; Lee, K.H.; Dechaphunkul, A.; Imamura, F.; Nogami, N.; Kurata, T.; Okamoto, I.; et al. Osimertinib in Untreated EGFR-Mutated Advanced Non-Small-Cell Lung Cancer. *N. Engl. J. Med.* **2018**, *378*, 113–125.
17. Shi, Y.; Fang, J.; Shu, Y.; Wang, D.; Yu, H.; Zhao, Y.; Zhang, L.; Zhu, B.; Li, X.; Chen, G.; Shi, J.; Zheng, R.; et al. A phase 1 study to evaluate safety and antitumor activity of BPI-7711 in EGFRM+/T790M+ advanced or recurrent NSCLC patients. *J. Thorac. Oncol.* **2019**, *37*, 9034.
18. Sequist, L.V.; Soria, J.C.; Goldman, J.W.; Wakelee, H.A.; Gadgeel, S.M.; Varga, A.; Papadimitrakopoulou, V.; Solomon, B.J.; Oxnard, G.R.; Dziadziuszko, R.; et al. Rociletinib in EGFR-mutated non-small-cell lung cancer. *N. Engl. J. Med.* **2015**, *372*, 1700–9.
19. Nishio, M.; Murakami, H.; Ohe, H.; Hida, T.; Sakai, H.; Kasahara, K.; Imamura, F.; Baba, T.; Kubota, K.; Hosomi, Y.; et al. Phase I study of TAS-121, a third-generation epidermal growth factor receptor (EGFR) tyrosine kinase inhibitor, in patients with non-small-cell lung cancer harboring EGFR mutations. *Invest. New Drugs* **2019**, *37*, 1207–1217.
20. Planchard, D.; Besse, B.; Groen, H.J.M.; Souquet, P.J.; Quoix, E.; Baik, C.S.; Barlesi, F.; Kim, T.M.; Mazieres, J.; Novello, S.; et al. Dabrafenib plus trametinib in patients with previously treated BRAF(V600E)-mutant metastatic non-small cell lung cancer: an open-label, multicentre phase 2 trial. *Lancet. Oncol.* **2016**, *17*, 984–993.
21. Planchard, D.; Smit, E.F.; Groen, H.J.M.; Mazieres, J.; Besse, B.; Helland, Å.; Giannone, V.; D'Amelio, A.M.; Zhang, Jr.P.; Mookerjee, B.; et al. Dabrafenib plus trametinib in patients with previously untreated BRAF(V600E)-mutant metastatic non-small-cell lung cancer: an open-label, phase 2 trial. *Lancet. Oncol.* **2017**, *18*, 1307–1316.
22. Subbiah, V.; Gervais, R.; Riely, G.; Hollebecque, A.; Blay, J.Y.; Felip, E.; Schuler, M.; Gonçalves, A.; Italiano, A.; Keedy, V.; et al. Efficacy of Vemurafenib in Patients With Non-Small-Cell Lung Cancer With BRAF V600 Mutation: An Open-Label, Single-Arm Cohort of the Histology-Independent VE-BASKET Study. *JCO Precis. Oncol.* **2019**, *3*
